# Supplementary material for: Chronic Pain in Patients with Spinal Muscular Atrophy in Switzerland: A Query to the Spinal Muscular Atrophy Registry
Source: MDPI journal article supplement (doi:10.3390/jcm13102798), 2024-05-09
Supplement: s1 [file s1]

## Supplementary Materials

The demographics of the Swiss SMA population (N=162) and the included study group (N=141) are described in table S1. Patients age ranged between 1 - 66 years with a median age of 21 years and 43% were female. Concerning SMA type, there were 29 (17.9%) patients with SMA type 1, 67 (41.4%) patients with SMA type 2, 62 (38.9%) patients with SMA type 3, and three patients (1.9%) that could not be classified with this nomenclature, as they were treated while asymptomatic. Scoliosis was present in 74.1% of patients, and contractures were present in 63.0% of the patients. Concerning mobility, 20.4% patients were walkers, 50.6% sitters, and 29.0% non-sitters.

**Table S1. Demographics of Swiss SMA patients**

| Variable            | Swiss-Reg-NMD<br>patients with SMA (N<br>= 162) | SMA patients<br>included in study (N<br>= 141) |
|---------------------|-------------------------------------------------|------------------------------------------------|
| n/N                 | -                                               | 86.50%                                         |
| <b>age range</b>    |                                                 |                                                |
| min                 | 1                                               | 1                                              |
| max                 | 66                                              | 66                                             |
| <b>age median</b>   | 21                                              | 18                                             |
| <b>sex</b>          |                                                 |                                                |
| female              | 70 (43%)                                        | 61 (43%)                                       |
| male                | 92 (57%)                                        | 80 (57%)                                       |
| <b>SMA type</b>     |                                                 |                                                |
| 1                   | 29 (18%)                                        | 28 (20%)                                       |
| 2                   | 67 (41%)                                        | 59 (42%)                                       |
| 3                   | 62 (39%)                                        | 51 (36%)                                       |
| non-classified      | 3 (2%)                                          | 3 (2%)                                         |
| <b>Scoliosis</b>    | 120 (74%)                                       | 107 (76%)                                      |
| <b>Contractures</b> | 102 (63%)                                       | 90 (64%)                                       |
| <b>Mobility</b>     |                                                 |                                                |
| walkers             | 33 (20.4%)                                      | 27 (19.2%)                                     |
| sitters             | 82 (50.6%)                                      | 71 (50.4%)                                     |
| non-sitters         | 47 (29%)                                        | 43 (30.5%)                                     |

**Table S2. Swiss-Reg-NMD Group**

|                    |                                                                                                                     |
|--------------------|---------------------------------------------------------------------------------------------------------------------|
| Dominique Baumann  | Institute of Social and Preventive Medicine, University of Bern                                                     |
| Cornelia Enzmann   | Pediatric Neurology, University Children's Hospital Basel                                                           |
| David Jacquier     | Pediatric Neurology and Neurorehabilitation, Lausanne University Hospital                                           |
| Hans H. Jung       | Department of Neurology, University Hospital Zurich                                                                 |
| Andrea Klein       | Department of Neurology, University Children's Hospital Basel and Inselspital Bern                                  |
| Claudia E. Kuehni  | Institute of Social and Preventive Medicine, University of Bern                                                     |
| Andrea Mathis      | Institute of Social and Preventive Medicine, University of Bern                                                     |
| Paolo Ripellino    | Neurocenter of Southern Switzerland, Lugano                                                                         |
| Oliver Scheidegger | Department of Neurology, Centre for Neuromuscular Diseases, Inselspital Bern                                        |
| Bettina Schreiner  | Department of Neurology, University Hospital Zurich                                                                 |
| Esther I. Schwarz  | Department of Respiratory Medicine, Sleep Disorders Centre and Neuromus-cular Centre, University Hospital of Zurich |
| Georg M. Stettner  | Department of Pediatric Neurology, University Children's Hospital Zurich                                            |
| Elea Galiart       | Department of Pediatric Neurology, University Children's Hospital Zurich                                            |
| Anne Tschertter    | Institute of Social and Preventive Medicine, University of Bern                                                     |
